# Supplementary material for: Colonization with enterotoxigenic Bacteroides fragilis is associated with early-stage colorectal neoplasia
Source: PLoS One. 2017 Feb 2;12(2):e0171602. doi: 10.1371/journal.pone.0171602 (PMC5289627; doi:10.1371/journal.pone.0171602)
Supplement: S1 Table — Number of samples by site (A, B, C and D). As only 62% of patients were sampled at site A, this site was omitted from our analyses to avoid the introduction of bias. (DOCX) [file pone.0171602.s001.docx]

S1 Table. Number of samples by site (A, B, C and D). As only 62% of patients were sampled at site A, this site was omitted from our analyses to avoid the introduction of bias.

| | Site | A | B | C | D | | --- | --- | --- | --- | --- | | Samples | 93 | 139 | 147 | 148 | |  | 0.62 | 0.93 | 0.98 | 0.99 | | | | |  |
| --- | --- | --- | --- | --- | --- | --- | --- | --- | --- | --- | --- | --- | --- | --- | --- | --- | --- | --- | --- |
|  |  |  |  |  |
|  |  |  |  |  |
